# Supplementary material for: Mixed‐Organic‐Cation Tin Iodide for Lead‐Free Perovskite Solar Cells with an Efficiency of 8.12%
Source: PubMed Central journal article supplement (PMC5700647; doi:10.1002/advs.201700204), 2017-07-14
Supplement: ADVS-4-na-s001.pdf [file ADVS-4-na-s001.pdf]

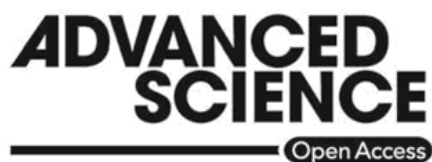

## Supporting Information

for *Adv. Sci.*, DOI: 10.1002/adv.201700204

Mixed-Organic-Cation Tin Iodide for Lead-Free Perovskite  
Solar Cells with an Efficiency of 8.12%

*Ziran Zhao, Feidan Gu, Yunlong Li, Weihai Sun, Senyun Ye,  
Haixia Rao, Zhiwei Liu,\* Zuqiang Bian,\* and Chunhui Huang*

## Supporting Information

**Mixed-organic-cation Tin Iodide for Lead-free Perovskite Solar Cells with an Efficiency of 8.12%**

Ziran Zhao, Feidan Gu, Yunlong Li, Weihai Sun, Senyun Ye, Haixia Rao, Zhiwei Liu,\* Zuqiang Bian,\* and Chunhui Huang

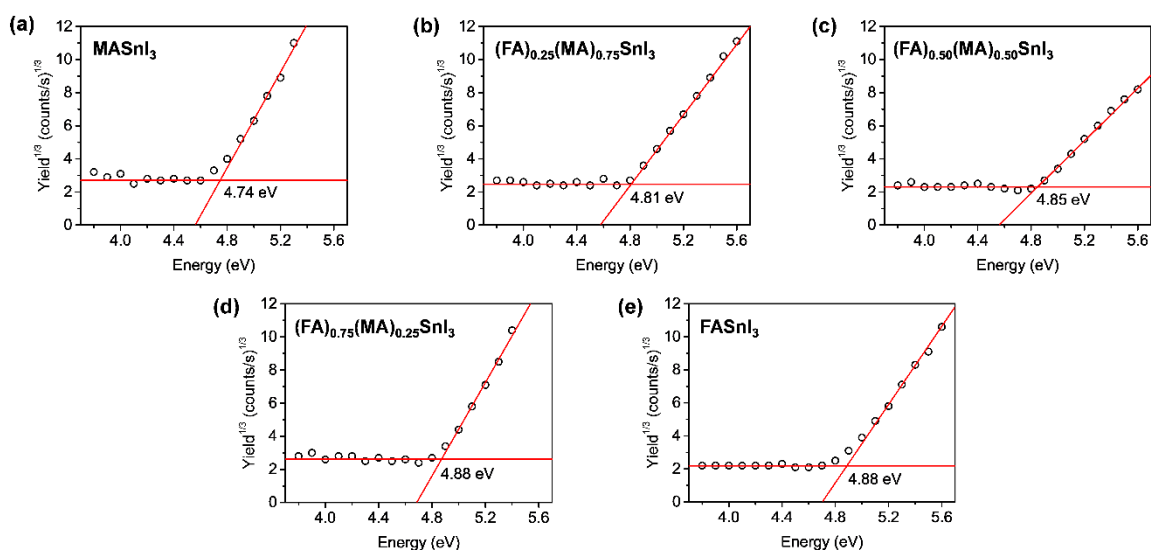

**Figure S1.** Photoemission spectroscopy measurements of (a)  $\text{MASnI}_3$ , (b)  $(\text{FA})_{0.25}(\text{MA})_{0.75}\text{SnI}_3$ , (c)  $(\text{FA})_{0.50}(\text{MA})_{0.50}\text{SnI}_3$ , (d)  $(\text{FA})_{0.75}(\text{MA})_{0.25}\text{SnI}_3$ , and (e)  $\text{FASnI}_3$  films deposited on ITO/PEDOT:PSS substrates. The valence band maxima (VBM) were estimated to be 4.74, 4.81, 4.85, 4.88, and 4.88 eV for  $\text{MASnI}_3$ ,  $(\text{FA})_{0.25}(\text{MA})_{0.75}\text{SnI}_3$ ,  $(\text{FA})_{0.50}(\text{MA})_{0.50}\text{SnI}_3$ ,  $(\text{FA})_{0.75}(\text{MA})_{0.25}\text{SnI}_3$ , and  $\text{FASnI}_3$ , respectively, from the intersections of the ground level lines and the regression lines.

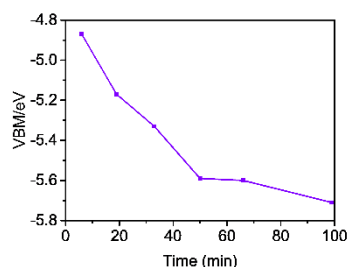

**Figure S2.** The valence band maxima (VBM) of  $\text{FASnI}_3$  after different exposure time in air.

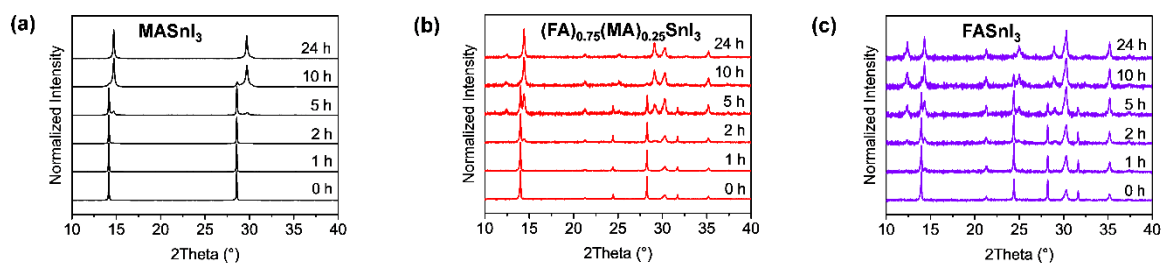

**Figure S3.** XRD patterns of (a) MASnI<sub>3</sub>, (b) (FA)<sub>0.75</sub>(MA)<sub>0.25</sub>SnI<sub>3</sub>, and (c) FASnI<sub>3</sub> films measured in ambient environment (temperature ~24 °C, relative humidity ~40%) for 24 h.

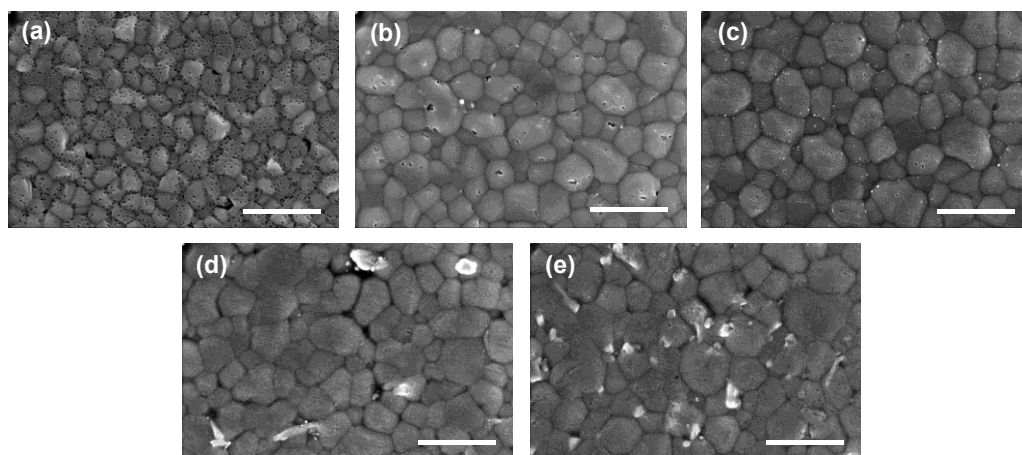

**Figure S4.** Scanning Electron Microscope (SEM) images of (FA)<sub>0.75</sub>(MA)<sub>0.25</sub>SnI<sub>3</sub> films prepared with (a) 0 mol% (b) 5 mol%, (c) 10 mol%, (d) 15 mol%, and (e) 20 mol% SnF<sub>2</sub> deposited on ITO/PEDOT:PSS substrates. Scale bar: 1.0 μm.

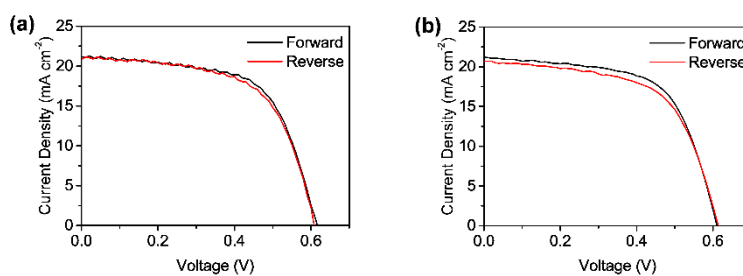

**Figure S5.**  $J$ - $V$  curves of the champion device measured under the simulation of AM 1.5G,  $100 \text{ mW cm}^{-2}$  using forward and reverse scan modes at a scan rate of (a)  $500 \text{ mV s}^{-1}$  and (b)  $100 \text{ mV s}^{-1}$ .

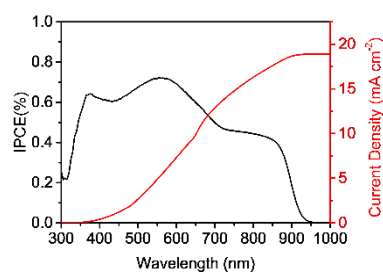

**Figure S6.** IPCE spectrum of the  $(\text{FA})_{0.75}(\text{MA})_{0.25}\text{SnI}_3$ -based device measured in air without encapsulation. The integrated  $J_{\text{sc}}$  is  $18.9 \text{ mA cm}^{-2}$ .

**Table S1. Photovoltaic parameters of devices based on (FA)<sub>0.75</sub>(MA)<sub>0.25</sub>SnI<sub>3</sub> with different SnF<sub>2</sub> molar ratios<sup>a)</sup>**

| SnF <sub>2</sub> ratio |          | $V_{oc}$ (V) | $J_{sc}$<br>(mA cm <sup>-2</sup> ) | FF (%)     | PCE (%)     |
|------------------------|----------|--------------|------------------------------------|------------|-------------|
| 0 mol%                 | Champion | 0.31         | 10.3                               | 49.0       | 1.57        |
|                        | Average  | 0.32 ± 0.01  | 8.8 ± 1.4                          | 47.1 ± 1.2 | 1.31 ± 0.19 |
| 5 mol%                 | Champion | 0.52         | 18.6                               | 55.8       | 5.39        |
|                        | Average  | 0.52 ± 0.00  | 18.4 ± 0.2                         | 54.7 ± 0.8 | 5.24 ± 0.09 |
| 10 mol%                | Champion | 0.58         | 20.7                               | 63.2       | 7.59        |
|                        | Average  | 0.58 ± 0.01  | 20.6 ± 0.2                         | 61.2 ± 1.8 | 7.28 ± 0.17 |
| 15 mol%                | Champion | 0.55         | 20.2                               | 60.6       | 6.98        |
|                        | Average  | 0.56 ± 0.01  | 20.6 ± 0.4                         | 57.1 ± 2.1 | 6.59 ± 0.22 |
| 20 mol%                | Champion | 0.55         | 19.7                               | 54.8       | 5.94        |
|                        | Average  | 0.56 ± 0.01  | 19.0 ± 0.4                         | 57.9 ± 1.1 | 5.33 ± 0.40 |

<sup>a)</sup>The statistical data including average values and standard deviations are calculated from 6 separate devices for each SnF<sub>2</sub> molar ratio.

**Table S2. Photovoltaic parameters of (FA)<sub>0.75</sub>(MA)<sub>0.25</sub>SnI<sub>3</sub>-based devices with different perovskite layer thicknesses<sup>a)</sup>**

| Thickness (nm) |          | $V_{oc}$ (V) | $J_{sc}$<br>(mA cm <sup>-2</sup> ) | FF (%)     | PCE (%)     |
|----------------|----------|--------------|------------------------------------|------------|-------------|
| 100            | Champion | 0.59         | 15.8                               | 66.4       | 6.18        |
|                | Average  | 0.58 ± 0.01  | 15.7 ± 0.2                         | 62.6 ± 4.5 | 5.73 ± 0.46 |
| 130            | Champion | 0.58         | 19.3                               | 64.0       | 7.16        |
|                | Average  | 0.57 ± 0.02  | 18.5 ± 0.6                         | 62.0 ± 1.9 | 6.48 ± 0.44 |
| 150            | Champion | 0.62         | 19.6                               | 67.7       | 8.10        |
|                | Average  | 0.61 ± 0.01  | 19.8 ± 0.3                         | 64.0 ± 2.2 | 7.68 ± 0.27 |
| 175            | Champion | 0.59         | 19.8                               | 62.1       | 7.26        |
|                | Average  | 0.58 ± 0.01  | 18.6 ± 0.8                         | 59.7 ± 2.1 | 6.50 ± 0.41 |
| 200            | Champion | 0.58         | 19.4                               | 61.1       | 6.88        |
|                | Average  | 0.58 ± 0.01  | 18.7 ± 0.9                         | 60.0 ± 4.2 | 6.45 ± 0.43 |
| 250            | Champion | 0.54         | 16.9                               | 54.6       | 4.98        |
|                | Average  | 0.54 ± 0.01  | 16.0 ± 0.5                         | 53.6 ± 3.0 | 4.63 ± 0.26 |

<sup>a)</sup>The statistical data including average values and standard deviations are calculated from at least 10 separate devices for each perovskite layer thickness.

**Table S3. Photovoltaic parameters of the champion device with different scan rates and scan directions**

| Scan rate (mV s <sup>-1</sup> ) | $V_{oc}$ (V) | $J_{sc}$<br>(mA cm <sup>-2</sup> ) | FF (%) | PCE (%) |      |
|---------------------------------|--------------|------------------------------------|--------|---------|------|
| 500                             | Forward      | 0.62                               | 21.2   | 61.6    | 8.09 |
|                                 | Reverse      | 0.61                               | 20.9   | 61.7    | 7.85 |
| 300                             | Forward      | 0.61                               | 21.2   | 62.7    | 8.12 |
|                                 | Reverse      | 0.61                               | 21.0   | 60.4    | 7.74 |
| 100                             | Forward      | 0.61                               | 21.2   | 62.2    | 8.03 |
|                                 | Reverse      | 0.61                               | 20.7   | 60.4    | 7.63 |

**Table S4. Recombination resistances ( $R_{rec}$ ) of (FA)<sub>x</sub>(MA)<sub>1-x</sub>SnI<sub>3</sub>-based devices fitted from the Nyquist plots**

| Bias (V) | x = 0 | x = 0.25 | x = 0.50 | x = 0.75 | x = 1 |
|----------|-------|----------|----------|----------|-------|
| 0        | 645.1 | 680.3    | 1516     | 3479     | 3917  |
| 0.1      | 552.9 | 560.6    | 1413     | 2907     | 3488  |
| 0.2      | 416.5 | 414.2    | 1115     | 1946     | 2797  |
| 0.3      | 236.9 | 230.8    | 634.3    | 1177     | 1010  |
| 0.4      | 127.3 | 138.9    | 163.6    | 459.2    | 146.5 |
